# Supplementary material for: A specific anti‐COVID‐19 BNT162b2 vaccine‐induced early innate immune signature positively correlates with the humoral protective response in healthy and multiple sclerosis vaccine recipients
Source: PubMed Central journal article supplement — Clin Transl Immunology. 2023 Mar 23;12(3):e1434. doi: 10.1002/cti2.1434 (PMC10036198; doi:10.1002/cti2.1434), 2023-03-23
Supplement: CTI2-12-e1434-s001.pdf [file CTI2-12-e1434-s001.pdf]

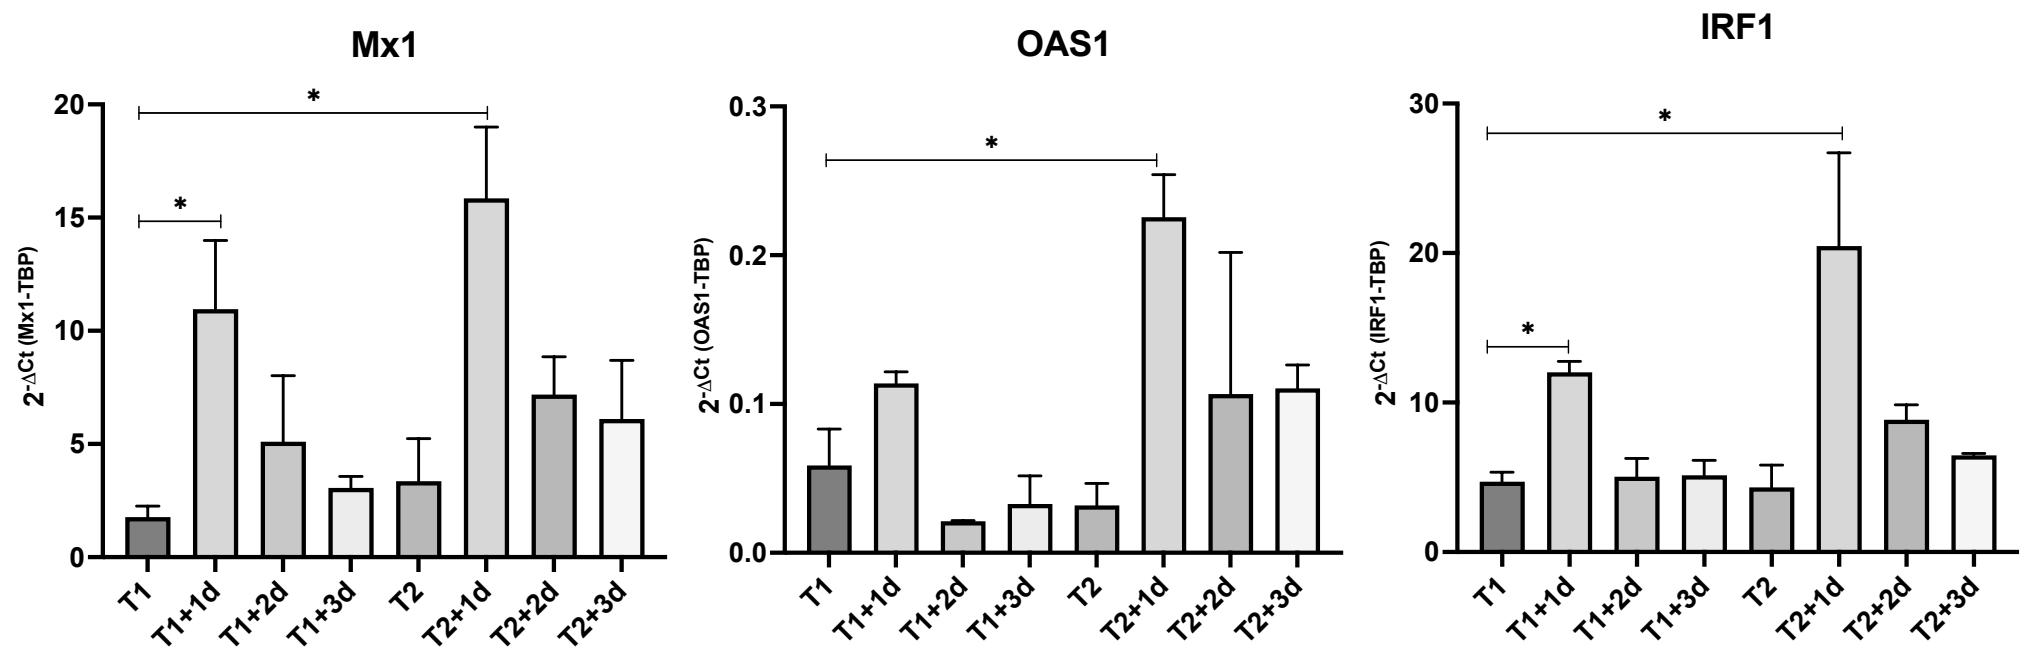

**Supplementary figure 1: Kinetic study of type I and II Interferon gene signature in healthy vaccine recipients.**

Freshly isolated peripheral blood mononuclear cells (PBMC) were collected from healthy subjects (n=4) immediately before (T1) and 1, 2 or 3 days after the 1<sup>st</sup> BNT162b2 vaccine dose (T1+1d, T1+2d and T1+3d respectively), as well as 1,2 and 3 days after the 2<sup>nd</sup> vaccine dose (T2+1d, T2+2d and T2+3d respectively). Relative expression of the interferon-stimulated genes Mx1, OAS1, IRF1 was measured by quantitative real time PCR analysis and normalized to the housekeeping gene TBP level by using the equation  $2^{-\Delta\Delta Ct}$  in cDNA derived from total RNA isolated from PBMC. Star scale  $P$ -values were as follows: \*  $\leq 0.05$ .

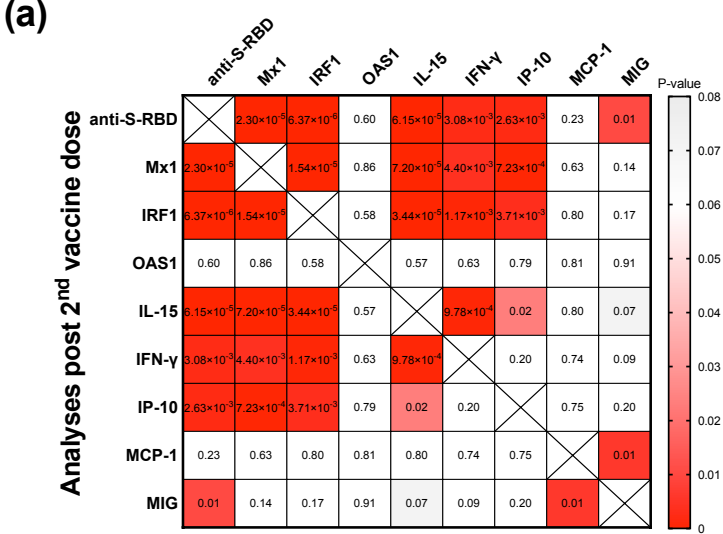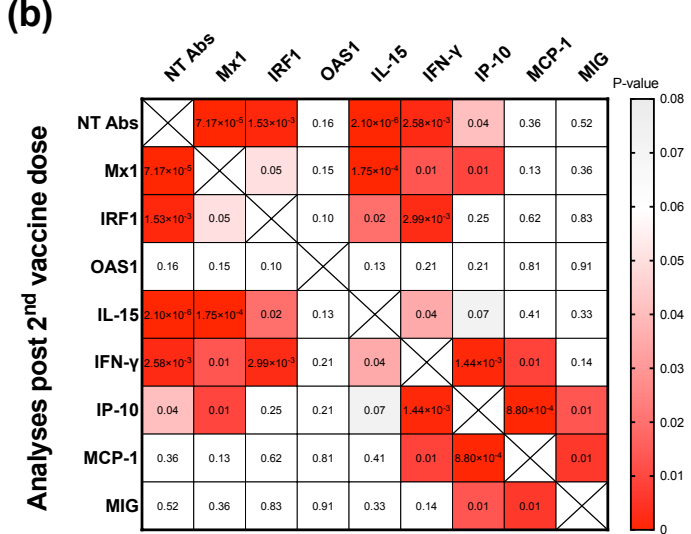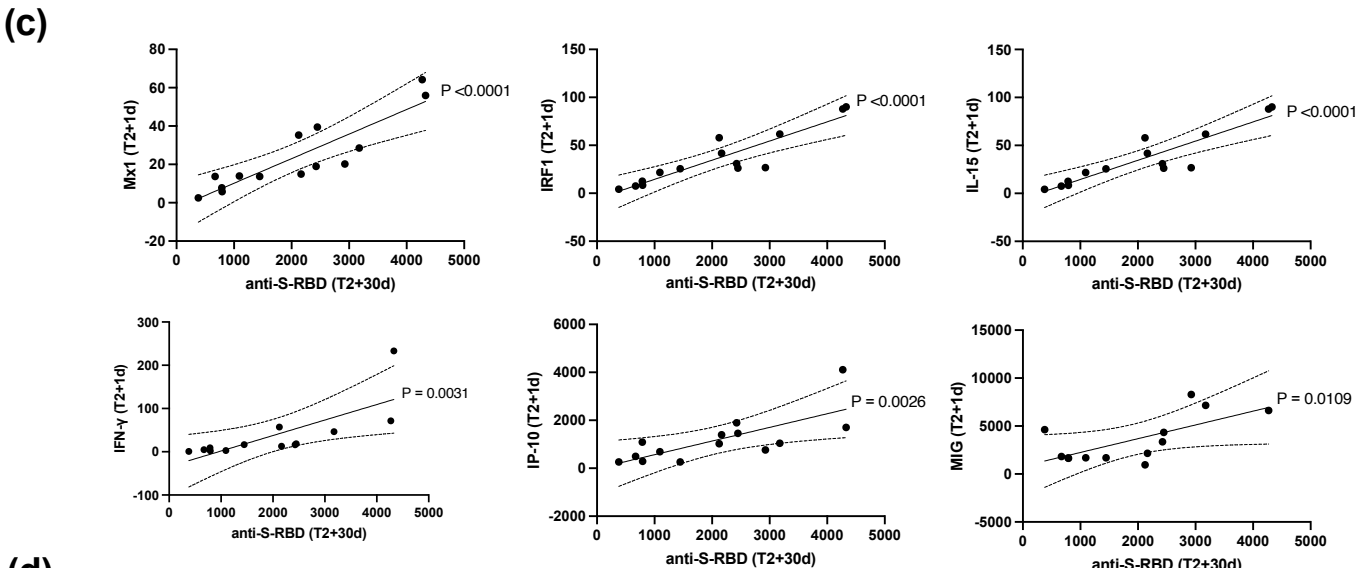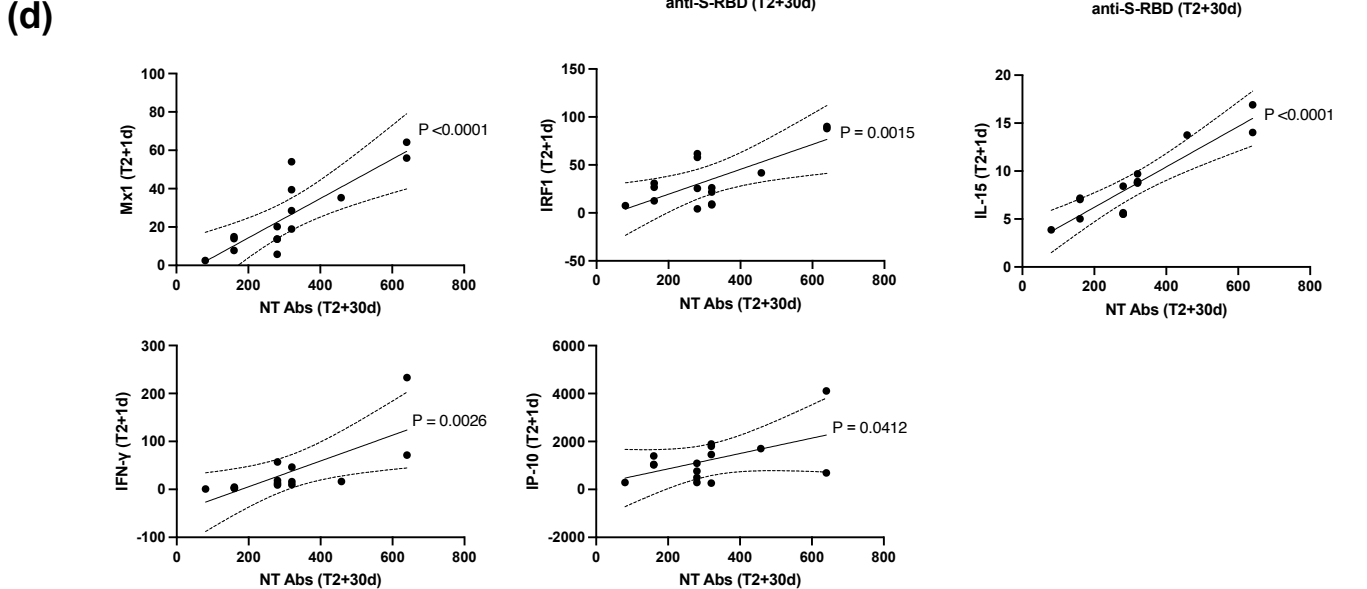

**Supplementary figure 2: Correlation of vaccine-specific antibody production with early innate signature in healthy recipients after 2<sup>nd</sup> dose.**

**(a, b)** Correlation matrices between anti-SARS-CoV-2 Spike-receptor binding domain Immunoglobulin G (anti-S-RBD, expressed as BAU ml<sup>-1</sup>) **(a)** or neutralizing antibodies against wild-type Wuhan SARS-CoV-2 variant (NT Abs, expressed as IC<sub>50</sub>) **(b)**, measured 30 days post 2<sup>nd</sup> vaccine dose (T2+30d), and correspondent early vaccine-induced signature, measured 1 day post 2<sup>nd</sup> vaccine dose (T2+1d), were constructed. Correlations were obtained by deriving a Pearson  $r$  correlation coefficient and here the probabilistic adjusted  $P$ -value associated to each correlation is shown. Significant correlations (with  $P$ -values  $\leq 0.05$ ) are indicated by shades of red color. **(c, d)** Single correlation curves between anti-S-RBD **(c)** or NT Abs **(d)** and specific early immune factors with significant linear regression (with  $P$ -values  $\leq 0.05$ ) are reported. 99% confidence bands of the best fit-line are also shown for each slope.

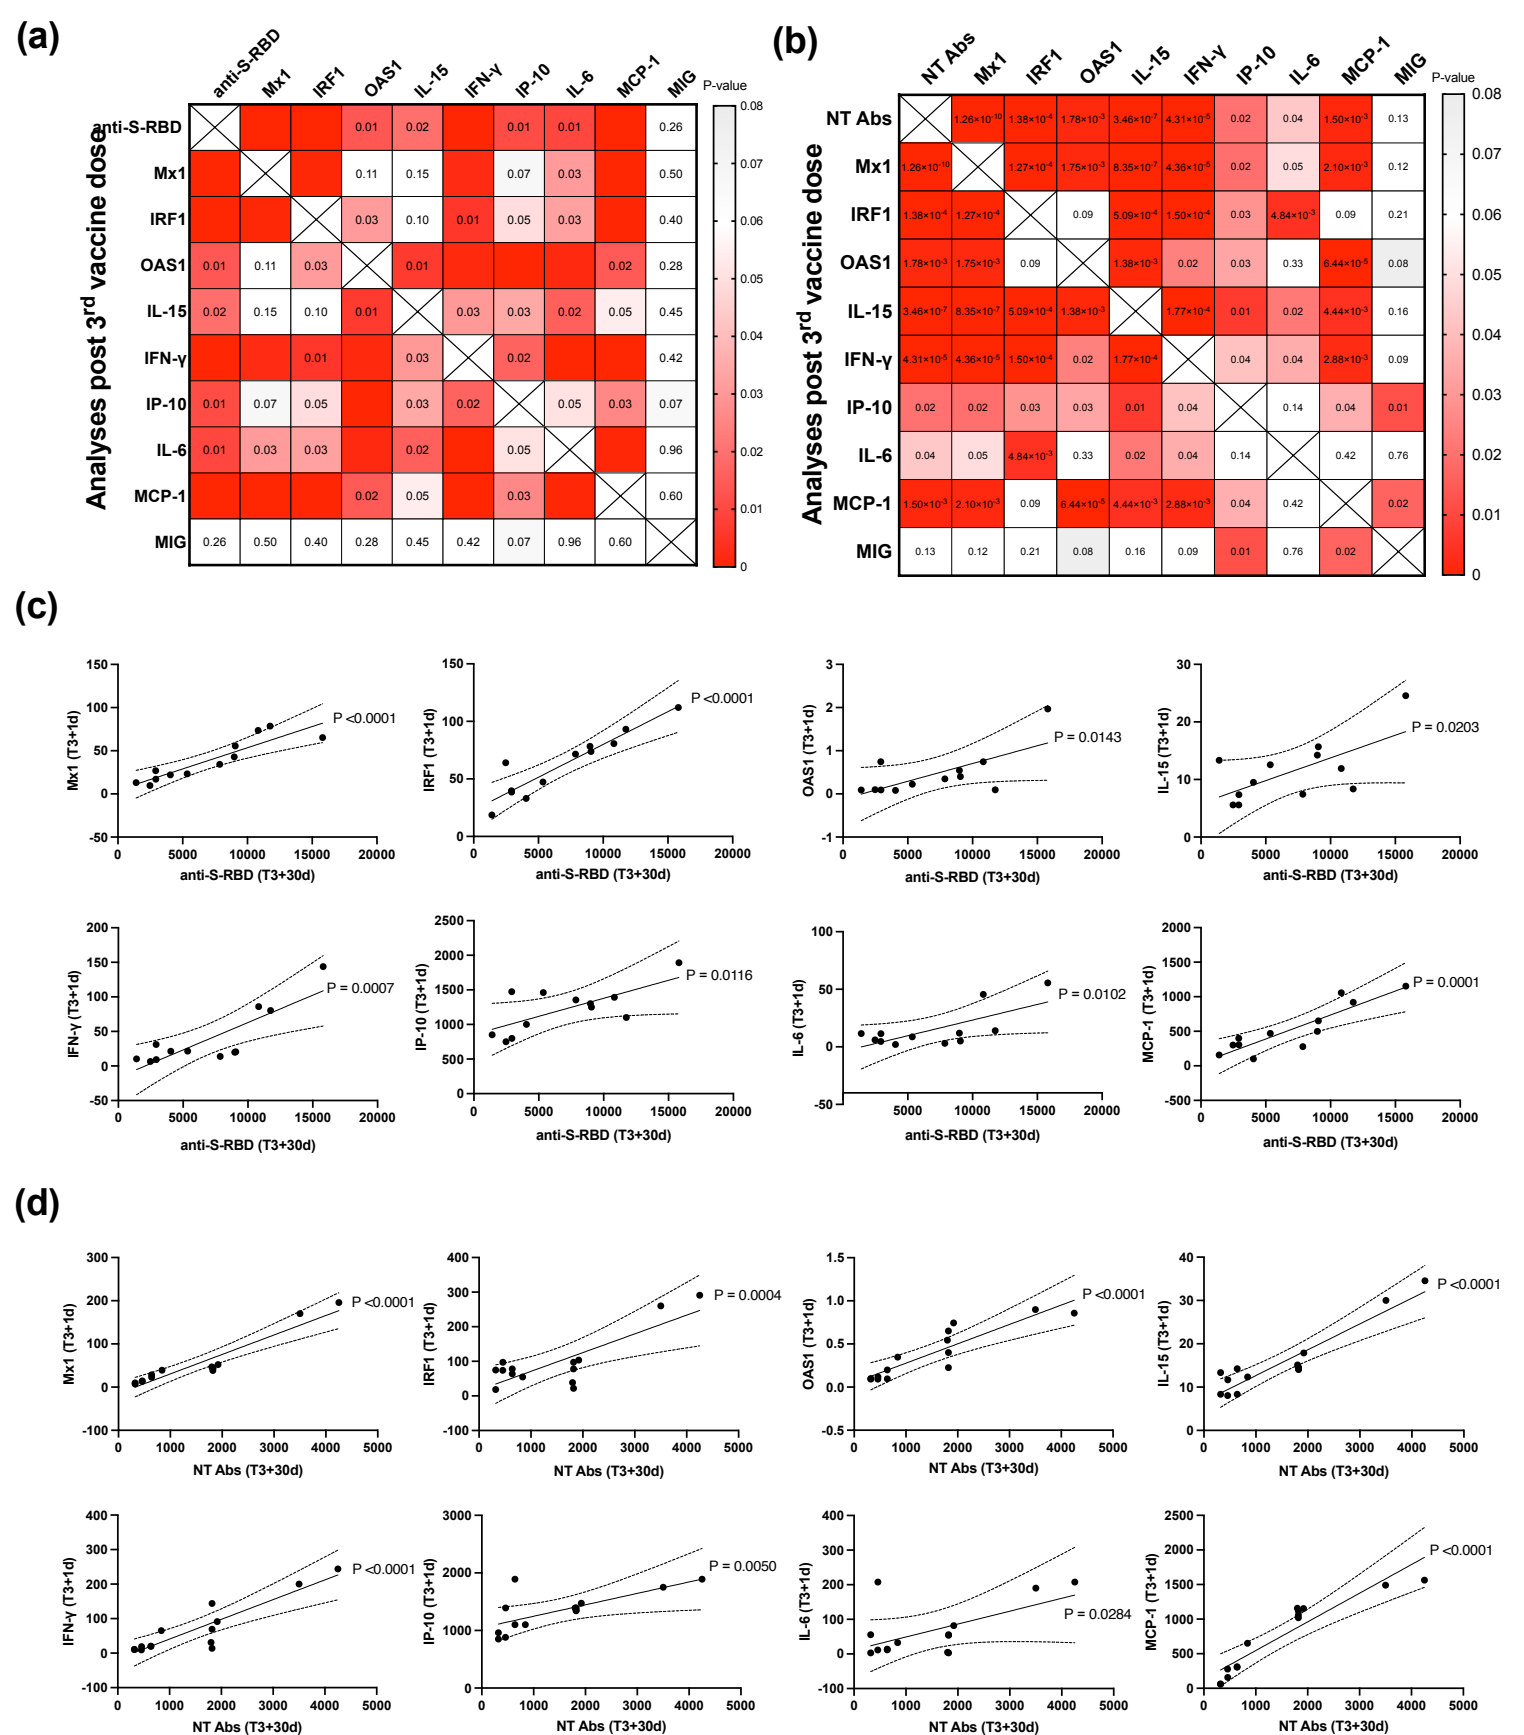

**Supplementary figure 3: Correlation of vaccine-specific antibody production with early innate signature in healthy recipients after 3<sup>rd</sup> dose.**

**(a, b)** Correlation matrices between anti-SARS-CoV-2 Spike-receptor binding domain Immunoglobulin G (anti-S-RBD, expressed as BAU ml<sup>-1</sup>) **(a)** or neutralizing antibodies against wild-type Wuhan SARS-CoV-2 variant (NT Abs, expressed as IC<sub>50</sub>) **(b)**, measured 30 days post 3<sup>rd</sup> vaccine dose (T2+30d), and correspondent early vaccine-induced signature, measured 1 day post 3<sup>rd</sup> vaccine dose (T2+1d), were constructed. Correlations were obtained by deriving a Pearson  $r$  correlation coefficient and here the probabilistic adjusted  $P$ -value associated to each correlation is shown. Significant correlations (with  $P$ -values  $\leq 0.05$ ) are indicated by shades of red color. **(c, d)** Single correlation curves between anti-S-RBD **(c)** or NT Abs **(d)** and specific early immune factors with significant linear regression (with  $P$ -values  $\leq 0.05$ ) are reported. 99% confidence bands of the best fit line are also shown for each slope.

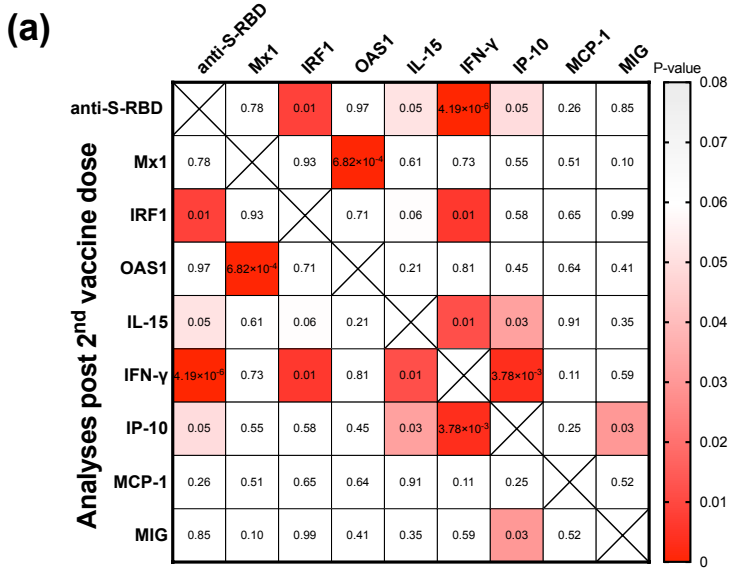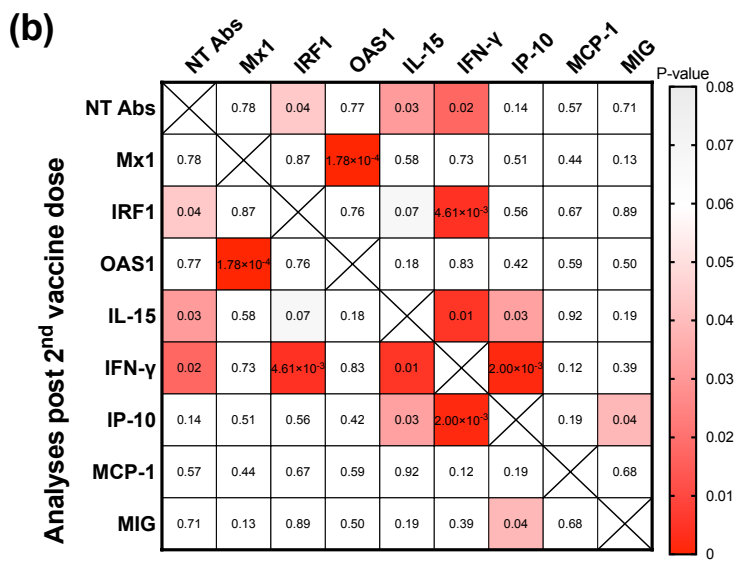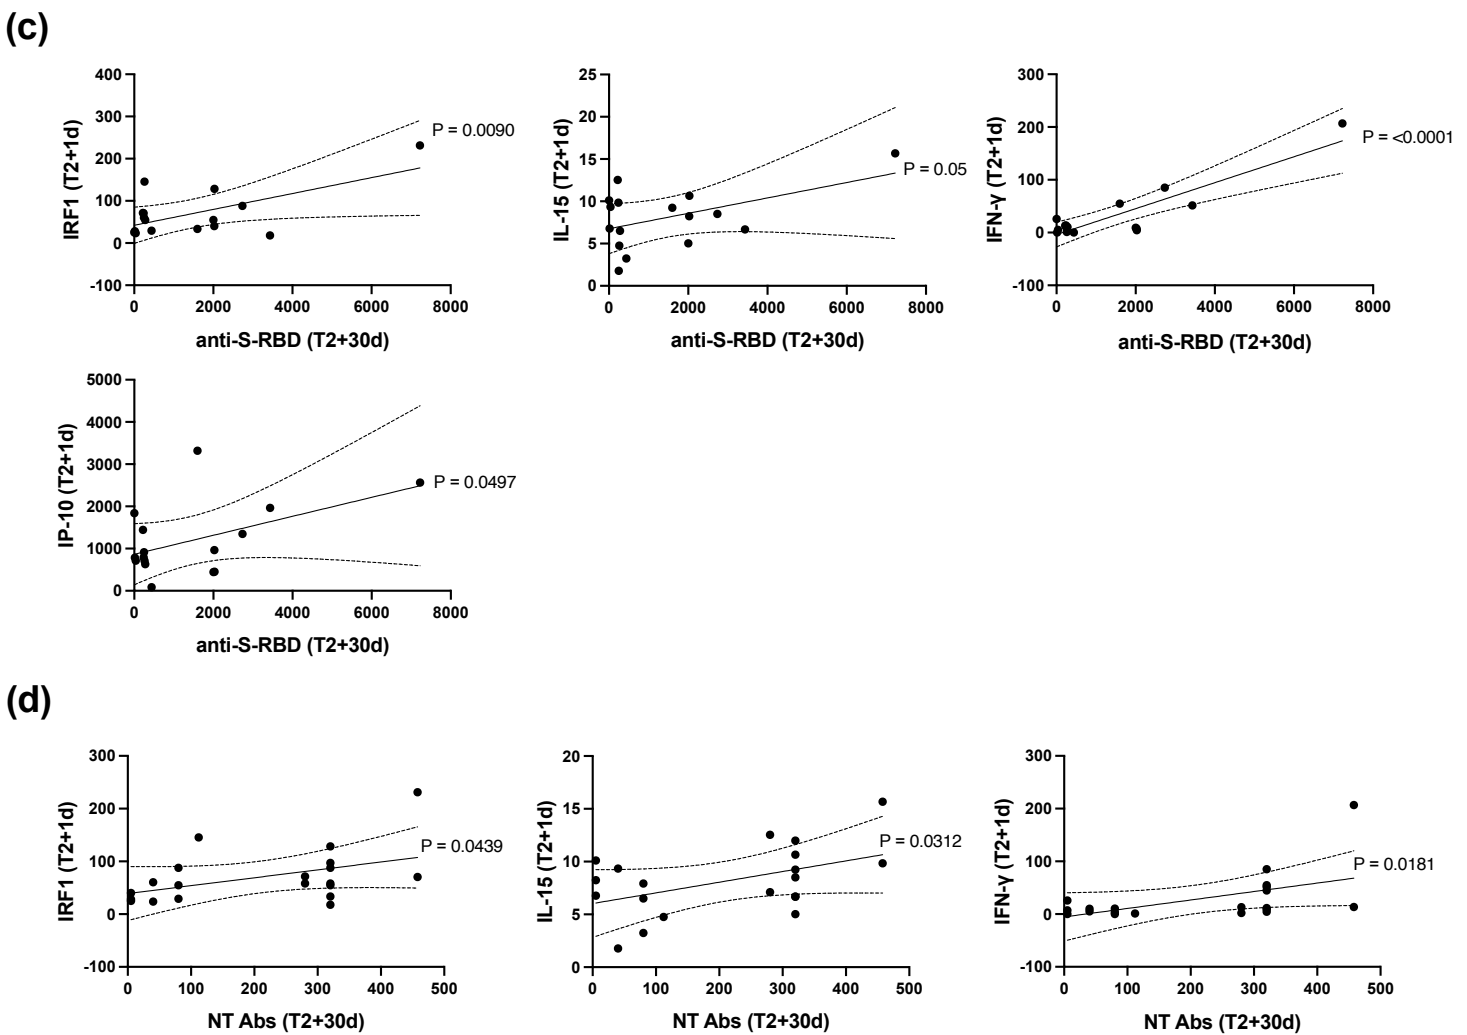

**Supplementary figure 4: Correlation of vaccine-specific antibody production with early innate signature in people with Multiple Sclerosis after 2<sup>nd</sup> dose.**

**(a, b)** Correlation matrices between anti-SARS-CoV-2 Spike-receptor binding domain Immunoglobulin G (anti-S-RBD, expressed as BAU ml<sup>-1</sup>) **(a)** or neutralizing antibodies against wild-type Wuhan SARS-CoV-2 variant (NT Abs, expressed as IC<sub>50</sub>) **(b)**, measured 30 days post 2<sup>nd</sup> vaccine dose (T2+30d), and correspondent early vaccine-induced signature, measured 1 day post 2<sup>nd</sup> vaccine dose (T2+1d), were constructed. Correlations were obtained by deriving a Pearson  $r$  correlation coefficient and here the probabilistic adjusted  $P$ -value associated to each correlation is shown. Significant correlations (with  $P$ -values  $\leq 0.05$ ) are indicated by shades of red color. **(c, d)** Single correlation curves between anti-S-RBD **(c)** or NT Abs **(d)** and specific early immune factors with significant linear regression (with  $P$ -values  $\leq 0.05$ ) are reported. 99% confidence bands of the best fit-line are also shown for each slope.

**Supplementary table 1: Serum level of inflammatory factors, cytokines and chemokines in healthy vaccine recipients**

|                                          | sCD40L   | EGF    | Eotaxin | FGF-2 | FLT-3L | Fractalkine | G-CSF | GRO-alpha | MCP-3 | M-CSF  | MDC    | MIP-1alpha | MIP-1beta | PDGF-AA | PDGF-AB/BB | VEGF-A |
|------------------------------------------|----------|--------|---------|-------|--------|-------------|-------|-----------|-------|--------|--------|------------|-----------|---------|------------|--------|
| Mean (T1)                                | 11332,31 | 191,95 | 99,72   | 50,74 | 34,58  | 165,91      | 44,16 | 18,81     | 23,74 | 76,26  | 721,25 | 312,49     | 278,82    | 5388,83 | 26258,60   | 304,87 |
| Mean (T1+1d)                             | 11734,50 | 190,55 | 94,89   | 54,92 | 31,12  | 175,21      | 51,02 | 19,40     | 23,99 | 43,15  | 711,16 | 203,35     | 66,15     | 5609,07 | 20584,82   | 286,65 |
| Mean (T2+2d)                             | 9646,22  | 199,65 | 88,83   | 50,44 | 33,88  | 151,99      | 46,60 | 17,84     | 21,42 | 103,27 | 644,64 | 168,89     | 103,34    | 4627,27 | 19217,73   | 269,21 |
| SD (T1)                                  | 7057,55  | 200,55 | 36,54   | 52,73 | 30,78  | 137,52      | 42,35 | 18,54     | 29,48 | 66,72  | 200,85 | 859,61     | 950,58    | 1474,16 | 24631,66   | 213,96 |
| SD (T1+1d)                               | 7978,59  | 179,79 | 45,07   | 52,71 | 28,31  | 168,37      | 45,31 | 13,48     | 29,48 | 19,12  | 220,00 | 358,09     | 88,61     | 1814,71 | 3376,69    | 146,60 |
| SD (T2+2d)                               | 6722,86  | 183,54 | 41,31   | 57,89 | 32,46  | 80,14       | 33,82 | 12,48     | 20,64 | 22,90  | 222,38 | 345,52     | 109,81    | 1284,49 | 3623,50    | 192,84 |
| paired Student's t-test (T1 vs T1+1d)    | 0,76     | 0,95   | 0,52    | 0,43  | 0,40   | 0,45        | 0,36  | 0,92      | 0,94  | 0,20   | 0,84   | 0,20       | 0,38      | 0,44    | 0,33       | 0,52   |
| paired Student's t-test (T1 vs T2+1d)    | 0,32     | 0,92   | 0,27    | 0,52  | 0,71   | 0,57        | 0,56  | 0,84      | 0,47  | 0,20   | 0,08   | 0,68       | 0,46      | 0,02    | 0,20       | 0,22   |
| paired Student's t-test (T1+1d vs T2+1d) | 0,34     | 0,84   | 0,66    | 0,82  | 0,43   | 0,49        | 0,94  | 0,87      | 0,52  | 0,02   | 0,23   | 0,93       | 0,21      | 0,02    | 0,10       | 0,64   |

|                                          | IL-1alpha | IL-1beta | IL-1RA | IL-2 | IL-4 | IL-5  | IL-7  | IL-9  | IL-10 | IL-12p40 | IL-12p70 | IL-13 | IL-17A | IL-17E / IL-25 | IL-17F | IL-18 | IL-22  | IL-27   | TGF-alpha | TNF-beta |
|------------------------------------------|-----------|----------|--------|------|------|-------|-------|-------|-------|----------|----------|-------|--------|----------------|--------|-------|--------|---------|-----------|----------|
| Mean (T1)                                | 94,08     | 169,12   | 14,3   | 2,70 | 2,50 | 13,00 | 24,70 | 39,87 | 14,65 | 41,89    | 20,33    | 59,71 | 29,83  | 614,41         | 45,50  | 20,28 | 104,10 | 1355,80 | 9,76      | 13,67    |
| Mean (T1+1d)                             | 37,76     | 20,06    | 4,42   | 1,46 | 3,18 | 13,76 | 23,86 | 38,09 | 15,37 | 34,90    | 22,66    | 62,35 | 14,07  | 619,29         | 43,21  | 21,18 | 146,27 | 1462,40 | 9,74      | 18,67    |
| Mean (T2+2d)                             | 35,94     | 125,39   | 10,6   | 2,71 | 1,59 | 9,13  | 29,20 | 36,38 | 17,80 | 40,95    | 6,89     | 43,68 | 34,05  | 634,05         | 43,97  | 23,73 | 84,04  | 2327,56 | 11,02     | 9,84     |
| SD (T1)                                  | 81,05     | 414,66   | 28,4   | 3,06 | 3,49 | 16,84 | 81,87 | 35,10 | 23,77 | 78,87    | 26,58    | 69,27 | 46,36  | 790,64         | 78,50  | 11,28 | 36,73  | 861,88  | 17,59     | 18,87    |
| SD (T1+1d)                               | 18,17     | 17,84    | 3,74   | 1,61 | 5,02 | 20,38 | 79,80 | 34,98 | 19,65 | 50,93    | 38,29    | 78,39 | 20,76  | 645,16         | 60,15  | 11,35 | 55,45  | 745,07  | 14,89     | 30,36    |
| SD (T2+2d)                               | 29,21     | 278,53   | 14,0   | 2,78 | 2,12 | 9,36  | 101,1 | 34,61 | 14,59 | 65,73    | 5,97     | 41,97 | 40,86  | 879,79         | 67,58  | 23,77 | 5,19   | 153,59  | 16,11     | 7,82     |
| paired Student's t-test (T1 vs T1+1d)    | 0,31      | 0,46     | 0,60   | 0,54 | 0,18 | 0,54  | 0,52  | 0,25  | 0,78  | 0,39     | 0,40     | 0,45  | 0,37   | 0,90           | 0,37   | 0,69  | 0,54   | 0,39    | 0,99      | 0,27     |
| paired Student's t-test (T1 vs T2+1d)    | 0,48      | 0,52     | 0,92   | 0,83 | 0,41 | 0,34  | 0,38  | 0,78  | 0,90  | 0,81     | 0,29     | 0,44  | 0,68   | 0,60           | 0,83   | 0,45  | 0,89   | 0,0026  | 0,30      | 0,43     |
| paired Student's t-test (T1+1d vs T2+1d) | 0,34      | 0,84     | 0,66   | 0,82 | 0,43 | 0,49  | 0,94  | 0,87  | 0,52  | 0,02     | 0,23     | 0,93  | 0,21   | 0,02           | 0,10   | 0,64  | 0,9    | 0,01    | 0,46      | 0,37     |

T1: baseline pre-Pfizer-BionTech BNT162b2 anti-COVID-19 vaccine, T1+1d: 1 day after 1<sup>st</sup> vaccine dose, T2+1d: 1 day after 2<sup>nd</sup> vaccine dose; SD: standard deviation.

Indicated in red color the statistically significant *P*-values ( $\leq 0.05$ ) as calculated by the paired Student's *t*-test.

**Supplementary table 2: Demographic and therapy-related information of vaccinated people with Multiple Sclerosis**

| <b>CODE</b>    | <b>SEX</b> | <b>Age</b> | <b>Therapy</b> |
|----------------|------------|------------|----------------|
| <b>MS-V-1</b>  | F          | 29         | IFN-beta (Peg) |
| <b>MS-V-2</b>  | M          | 45         | DMF            |
| <b>MS-V-3</b>  | F          | 44         | Ocrelizumab    |
| <b>MS-V-4</b>  | F          | 29         | IFN-beta (1-a) |
| <b>MS-V-5</b>  | F          | 21         | Fingolimod     |
| <b>MS-V-6</b>  | F          | 46         | IFN-beta (1-a) |
| <b>MS-V-7</b>  | M          | 41         | Fingolimod     |
| <b>MS-V-8</b>  | M          | 39         | DMF            |
| <b>MS-V-9</b>  | F          | 36         | Fingolimod     |
| <b>MS-V-10</b> | M          | 39         | natalizumab    |
| <b>MS-V-11</b> | F          | 45         | IFN-beta (1-a) |
| <b>MS-V-12</b> | M          | 46         | DMF            |
| <b>MS-V-13</b> | F          | 37         | Fingolimod     |
| <b>MS-V-14</b> | F          | 41         | IFN-beta (1-a) |
| <b>MS-V-15</b> | M          | 41         | IFN-beta (1-b) |
| <b>MS-V-16</b> | F          | 31         | natalizumab    |
| <b>MS-V-17</b> | M          | 49         | no therapy     |
| <b>MS-V-18</b> | M          | 39         | natalizumab    |
| <b>MS-V-19</b> | F          | 26         | Ocrelizumab    |
| <b>MS-V-20</b> | F          | 41         | no therapy     |
| <b>MS-V-21</b> | F          | 29         | Ocrelizumab    |
| <b>MS-V-22</b> | F          | 40         | no therapy     |

MS-V: people with Multiple Sclerosis vaccinated with anti-COVID-19 BNT162b2 vaccine; M: male; F: female
